1 Unravelling the determinants of human health in French Polynesia: the MATAEA  
2 project

3 **Running title:** Health determinants in French Polynesia

4 Iotefa Teiti<sup>1†</sup>, Maite Aubry<sup>1†</sup>, Sandrine Fernandes-Pellerin<sup>2</sup>, Etienne Patin<sup>3</sup>, Yoann Madec<sup>4</sup>,  
5 Pauline Boucheron<sup>4</sup>, Jessica Vanhomwegen<sup>5</sup>, Jérémie Torterat<sup>6</sup>, Stéphane Lastère<sup>7</sup>, Sophie  
6 Olivier<sup>8</sup>, Anthony Jaquaniello<sup>3,9</sup>, Maguelonne Roux<sup>3,10</sup>, Vincent Mendiboure<sup>4</sup>, Christine  
7 Harmant<sup>3</sup>, Aurélie Bisiaux<sup>3</sup>, Gaston Rijo de León<sup>3</sup>, Dang Liu<sup>3</sup>, Hervé Bossin<sup>11</sup>, Françoise  
8 Mathieu-Daudé<sup>11,12</sup>, Clémence Gatti<sup>13</sup>, Edouard Suhas<sup>14</sup>, Kiyojiken Chung<sup>1</sup>, Bertrand Condat<sup>15</sup>,  
9 Pierre Ayotte<sup>16</sup>, Nicolas Prud'homme<sup>6</sup>, Eric Conte<sup>17</sup>, Nathalie Jolly<sup>2</sup>, Jean-Claude Manugerra<sup>5</sup>,  
10 Anavaj Sakuntabhai<sup>18</sup>, Arnaud Fontanet<sup>4,19§</sup>, Lluís Quintana-Murci<sup>3,20§</sup>, Van-Mai Cao-  
11 Lormeau<sup>1§\*</sup>

12 <sup>1</sup> Laboratory of research on emerging viral diseases, Institut Louis Malardé, Papeete, Tahiti, French  
13 Polynesia

14 <sup>2</sup> Center for Translational Sciences, Institut Pasteur, Paris, France

15 <sup>3</sup> Institut Pasteur, Université Paris Cité, CNRS UMR2000, Human Evolutionary Genetics Unit, F-  
16 75015 Paris, France

17 <sup>4</sup> Institut Pasteur, Université Paris Cité, Epidemiology of emerging diseases unit, 75015 Paris, France

18 <sup>5</sup> Environment and Infectious Risk Unit, Laboratory for Urgent Response to Biological Threats, Institut  
19 Pasteur, Paris, France

20 <sup>6</sup> Institut de la Statistique de la Polynésie française, Papeete, Tahiti, French Polynesia

21 <sup>7</sup> Clinical Laboratory, Centre hospitalier de Polynésie française, Pirae, Tahiti, French Polynesia

22 <sup>8</sup> Clinical Laboratory, Institut Louis Malardé, Papeete, Tahiti, French Polynesia

23 <sup>9</sup> Institut Pasteur, Data Management Core Facility, Paris, France

24 <sup>10</sup> Institut Pasteur, Université de Paris, Bioinformatics and Biostatistics Hub, F-75015 Paris, France

25 <sup>11</sup> Laboratory of research in medical entomology, Institut Louis Malardé, Paea, Tahiti, French  
26 Polynesia

27 <sup>12</sup> MIVEGEC, University of Montpellier, CNRS, IRD, Montpellier, France

28 <sup>13</sup> Laboratory of Marine Biotoxins, UMR241-Ecosystèmes Insulaires Océaniques (EIO) (IFREMER,  
29 ILM, IRD, UPF), Institut Louis Malardé, Papeete, Tahiti, French Polynesia

30 <sup>14</sup> Unit on non-communicable diseases, UMR241-Ecosystèmes Insulaires Océaniques (EIO)  
31 (IFREMER, ILM, IRD, UPF), Institut Louis Malardé, Papeete, Tahiti, French Polynesia

32 <sup>15</sup> Department of Gastroenterology, Centre hospitalier de Polynésie française, Pirae, Tahiti, French  
33 Polynesia

34 <sup>16</sup> Centre de Toxicologie du Québec, Institut National de Santé Publique du Québec, Québec, Canada

35 <sup>17</sup> Maison des Sciences de l'Homme du Pacifique, Université de la Polynésie française, Punaauia,  
36 Tahiti, French Polynesia

37 <sup>18</sup> Functional Genetics of Infectious Diseases Unit, Department of Global Health, Institut Pasteur, Paris  
38 Cedex 15, France

39 <sup>19</sup> PACRI unit, Conservatoire National des Arts et Métiers, Paris, France

40 <sup>20</sup> Chair Human Genomics and Evolution, Collège de France, Paris 75005, France

41 \* **Correspondence:**

42 Van-Mai Cao-Lormeau

43 [mlormeau@ilm.pf](mailto:mlormeau@ilm.pf)

44 † **These authors have contributed equally to this work and share first authorship**

45 § **These authors have contributed equally to this work and share last authorship**

46 **Keywords: French Polynesia, cross-sectional survey, non-communicable diseases,**  
47 **communicable diseases, population genetics.**

48

## 49 **Abstract**

50 **Background:** French Polynesia is a French overseas collectivity in the Southeast Pacific, comprising  
51 75 inhabited islands across five archipelagoes. The human settlement of the region corresponds to the  
52 last massive migration of humans to empty territories, but its timeline is still debated. Despite their  
53 recent population history and geographical isolation, inhabitants of French Polynesia experience health  
54 issues similar to those of continental countries. Modern lifestyles and increased longevity have led to  
55 a rise in non-communicable diseases (NCDs) such as obesity, diabetes, hypertension, and  
56 cardiovascular diseases. Likewise, international trade and people mobility have caused the emergence  
57 of communicable diseases (CDs) including mosquito-borne and respiratory diseases. Additionally,  
58 chronic pathologies including acute rheumatic fever, liver diseases, and ciguatera, are highly prevalent  
59 in French Polynesia. However, data on such diseases are scarce and not representative of the  
60 geographic fragmentation of the population.

61 **Objectives:** The MATAEA project aims to estimate the prevalence of several NCDs and CDs in the  
62 population of the five archipelagoes, and identify associated risk factors. Moreover, genetic analyses  
63 will contribute to determinate the sequence and timings of the peopling history of French Polynesia,  
64 and identify causal links between past genetic adaptation to island environments, and present-day  
65 susceptibility to certain diseases.

66 **Methods:** This cross-sectional survey is based on the random selection of 2,100 adults aged 18-69  
67 years and residing on 18 islands from the five archipelagoes. Each participant answered a questionnaire  
68 on a wide range of topics (including demographic characteristics, lifestyle habits and medical history),  
69 underwent physical measurements (height, weight, waist circumference, arterial pressure, and skin  
70 pigmentation), and provided biological samples (blood, saliva, and stool) for biological, genetic and  
71 microbiological analyses.

72 **Conclusion:** For the first time in French Polynesia, the MATAEA project allows to collect a wide  
73 range of data to explore the existence of indicators and/or risk factors for multiple pathologies of public  
74 health concern. The results will help health authorities to adapt actions and preventive measures aimed  
75 at reducing the incidence of NCDs and CDs. Moreover, the new genomic data generated in this study,  
76 combined with anthropological data, will increase our understanding of the peopling history of French  
77 Polynesia.

78

## 79 INTRODUCTION

80 French Polynesia is located in the Southeast Pacific and within the Polynesian triangle, which is  
81 bounded by the islands of Hawaii to the North, Aotearoa (New Zealand) to the West and Rapa Nui  
82 (Easter Island) to the East. This French overseas collectivity extends over a maritime area as large as  
83 Europe and includes 121 islands, of which 75 are inhabited, distributed within five archipelagoes:  
84 Society, Marquesas, Tuamotu, Gambier and Austral (Figure 1). According to the previous national  
85 population census conducted in 2017, there are about 276,000 inhabitants distributed in the various  
86 archipelagoes, of which nearly 75% are concentrated in the islands of Tahiti and Moorea (Windward  
87 Islands, Society archipelago) (1).

88 In the course of the history of human migrations around the world, Pacific islands, and  
89 Polynesia in particular, were the last empty lands to be settled (2). Although archaeological and  
90 linguistic data have provided evidence for the geographical and temporal origin of the populations of  
91 the Eastern Pacific islands, the sequence and timings of settlement of the Polynesian islands are still  
92 debated (3). To help elucidate these gaps, a few genetic studies including samples from Pacific  
93 populations have been conducted over the past five years (2-6). However, for the studies involving the  
94 use of samples from the population of French Polynesia, only a limited number of samples collected  
95 in a few islands were available. Some studies also aimed to identify genomic variations related to  
96 adaptation of the populations to island environments. In a study including genomes from 20  
97 populations from the Pacific region, candidate variants for positive selection were found in genes  
98 relating to immunity and metabolism, suggesting genetic adaptation to pathogens and food sources  
99 specific to Pacific islands (4). However, further investigations are needed to identify causal links  
100 between past genetic adaptation and present-day disease risk in Pacific settings. Indeed, most studies  
101 investigating genetic links with vulnerabilities to non-communicable (NCDs) and communicable  
102 (CDs) diseases have focused on populations in Africa, Europe, Asia, and USA (7-10). The same  
103 observation is made for the research investigating the link between human gut microbiome composition  
104 and susceptibility to diseases (7). Despite the high burden of various NCDs and CDs, Pacific islands  
105 remain highly underrepresented in genomic studies.

106 In addition to genetic and microbial factors, social and environmental factors such as poverty,  
107 education, and access to healthcare are thought to be major drivers of disease burden in the Pacific  
108 islands (7). In French Polynesia, prevention measures against NCDs and CDs have been enhanced, and  
109 access to healthcare has been improved in all archipelagoes over the past 3 decades (11). This has  
110 certainly contributed to the extension of life expectancy at birth, which has increased from 67.1 years  
111 to 74.7 for men and 72.8 years to 79.1 for women between 1990 and 2020 (12). However, modern  
112 lifestyles (including overconsumption of food and physical inactivity) and increased longevity have  
113 led to a rise in the incidence of NCDs (13). The most recent data collected in French Polynesia in 2010  
114 indicated that the prevalence of obesity and hypertension in adults was 40.4% and 26.7%, respectively.  
115 It was estimated that only 1.7% of the population of French Polynesia presented a low risk of  
116 developing a NCD whereas 45% were at high risk (14). According to the latest reports from the health  
117 authorities of French Polynesia, the leading causes of death are cardiovascular diseases (26.1%) mainly  
118 associated with lifestyle, and cancers (25.1%) (15, 16). Among the Pacific island countries and  
119 territories (PICTs), French Polynesia displayed one of the highest age-standardized cancer incidence  
120 (267.9 for males and 214.0 for females per 100,000) and age-standardized cancer mortality (157.2 for  
121 males and 106.8 for females per 100,000) in 2020 (17-19). The most frequently reported cancers are  
122 lung, prostate, breast, thyroid and colorectal cancers (19). Moreover, the incidence of hepatocellular  
123 carcinoma recorded in the Austral archipelago between 2013 and 2017 is among the highest in the  
124 world (43.1/100,000 inhabitants), this pathology being associated with a high prevalence of infection  
125 with hepatitis B virus (HBV) and obesity (20).

126 Dietary habits, especially high fish consumption, also expose the population of French  
127 Polynesia to seafood-related NCDs. Among them, ciguatera poisoning, a disease caused by the  
128 consumption of reef fishes or marine invertebrates contaminated by neurotoxins (ciguatoxins)  
129 produced by the microalgae *Gambierdiscus*, is highly prevalent in French Polynesia where it  
130 constitutes an important public health issue (21). In 2021, the overall incidence rate of ciguatera, based  
131 on the number of symptomatic cases reported by healthcare workers or by the patients themselves, was  
132 6.9/10,000 inhabitants (22). However, as (i) ciguatera is not on the list of notifiable diseases, (ii) a large  
133 proportion of ciguatera-affected people do not consult a healthcare worker, and (iii) cases requiring  
134 emergency care or hospitalization in the main hospital of French Polynesia (*Centre hospitalier de*  
135 *Polynésie française*, Tahiti) are not systematically recorded, the true incidence rate of this disease is  
136 underestimated. Another source of seafood-related contaminants are heavy metals including mercury  
137 and lead. Indeed, high levels of mercury were detected in adolescents and adults from two atolls of the  
138 Tuamotu archipelago (Hao and Makemo) (23), in adults from the Leeward islands (Tahiti and Moorea)  
139 (24), and in cord blood samples of delivering women from all archipelagoes, suggesting that Polynesian  
140 newborns may be prenatally exposed to high doses of mercury (25). Moreover, concentrations of lead  
141 exceeding toxicological reference values were found in a significant proportion of the residents of Hao  
142 and Makemo islands tested to assess their exposure to toxic metals and polychlorinated biphenyls  
143 (PCBs) (23). Although levels of PCBs found in both atolls were low compared to international  
144 standards, there was a higher body burden of PCBs in residents of Hao which was suggested to be  
145 potentially linked to some contamination of the environment by military support activities in this  
146 island. Another source of environmental contamination that may have an impact on the population  
147 health are pesticides. To our knowledge, there are no data concerning the level of exposure to pesticides  
148 of the population of French Polynesia. However, surveys on the pollution of French Polynesia coral  
149 reefs by pesticides found the presence of herbicides and insecticides in fishes which are commonly  
150 consumed by the local inhabitants (26-28).

151 In addition to NCDs, CDs represent major health problems in French Polynesia. As a result of  
152 the prevention, screening, treatment and vaccination programs implemented by the health authorities,  
153 the incidence of several CDs has decreased (29). Despite these efforts, some CDs caused by bacterial  
154 infections persist, including leprosy (mean incidence of 1.6 cases per 100,000 inhabitants reported from  
155 2000 to 2017) and tuberculosis (incidence of 19.4 cases per 100,000 inhabitants in 2018) (30, 31).  
156 Moreover, in 2013, the prevalence of Bancroftian lymphatic filariasis, an infection caused by the  
157 nematode worm *Wuchereria bancrofti* transmitted by mosquitoes, still had not reached the elimination  
158 threshold (*i.e.* filarial antigenemia <1%) defined by the World Health Organization (WHO) in Tahiti,  
159 Huahine (Leeward Islands, Society archipelago) and three islands in the Marquesas archipelago  
160 (Tahuata, Hiva Oa and Fatu Hiva), despite several years of community treatment (32-35). Furthermore,  
161 HBV remains a public health problem, despite the availability of an effective vaccine. Following the  
162 finding of hepatitis B surface antigens (HBsAg) among 10.48% inhabitants of the Austral archipelago  
163 randomly selected in 1987 (36), vaccination of children at birth started to be implemented in 1992 to  
164 decrease the burden of chronic HBV infection in French Polynesia (37), and became mandatory in  
165 1995 (38). A nationwide serosurvey conducted in 2014 in 6 years old schoolchildren from the five  
166 archipelagoes showed a three-dose vaccination coverage of 98% and a prevalence of HBsAg of 0%  
167 (39). However, screening in 2019 of all adult residents of Rapa, the most isolated island of the Austral  
168 archipelago, revealed a prevalence of HBsAg of 11% in people born before 1992 (20).

169 Among the CDs considered as important public health issues in French Polynesia, those caused  
170 by arthropod-borne viruses (arboviruses) represent the highest risk for the population. Indeed, the four  
171 serotypes of dengue virus (DENV-1 to -4) have caused multiple outbreaks over the last decades, with  
172 deaths frequently reported in children (40, 41). Moreover, Zika virus (ZIKV) and chikungunya virus  
173 (CHIKV) caused explosive outbreaks in 2013-2014 (42) and 2014-2015 (43), respectively. During the  
174 ZIKV outbreak, severe neurologic complications in adults (44) and central nervous system

175 malformations in newborns and fetuses (45) were recorded. In addition to arboviral diseases, CDs  
176 caused by respiratory viruses have become major health concerns over the past decades. Several  
177 epidemics of variable severity caused by influenza A and/or B viruses have been reported in French  
178 Polynesia (29). While influenza was not considered a public health priority until the early 2000s, an  
179 epidemic caused by the influenza A virus subtype H1N1 highly affected the population of French  
180 Polynesia in 2009, with 13 severe cases requiring hospitalization in a critical care service and 7 deaths  
181 recorded (46). More recently, the severe acute respiratory syndrome coronavirus 2 (SARS-CoV-2)  
182 reached French Polynesia in March 2020 and caused several epidemic waves, with a total of 78,864  
183 confirmed cases, 3,315 hospitalizations and 783 deaths reported as of August 31, 2022. A serosurvey  
184 conducted at the end of 2021, from a representative sample of the adult population of Tahiti, found that  
185 57.7% of the study participants had been infected by SARS-CoV-2 during the first two epidemic waves  
186 (47).

187 Bacterial infections also represent a significant risk for the population of French Polynesia. The  
188 incidence of leptospirosis, a rodent-borne disease caused by bacteria belonging to the order  
189 *Spirochaetales*, exploded in 2017 with a rate of 72/100,000 inhabitants (48). Moreover, the incidence  
190 of *Staphylococcus aureus* (*S. aureus*) infections was estimated at 38/100,000 inhabitants in 2008, and  
191 this bacterium was shown to be responsible for one third of the community bacterial infections  
192 documented in French Polynesia. The proportion of *S. aureus* strains resistant to methicillin increased  
193 from less than 10% in 1995 to more than 35% in 2001 (49). French Polynesia is also characterized by  
194 the unusual high prevalence of acute rheumatic fever associated with infection by Group A  
195 streptococcus, with an incidence of 0.06% and a prevalence of 1.29% reported in 2015 (29, 50).

196 Although data exist on the levels of exposure of the population and the risk factors associated  
197 with NCDs and CDs in French Polynesia, these data are often old, fragmentary and concern a few  
198 islands. Moreover, genomic data, based on whole-genomes, from the Polynesian populations are  
199 lacking, precluding a comprehensive assessment of the settlement history of the various islands and  
200 archipelagoes, and of the history of adaptation of these populations to island environments - an  
201 information that should be of great benefit for the study of the genetic basis of certain diseases that  
202 present high incidence in the region. Here we describe the MATAEA project, a wide cross-sectional  
203 population-based survey designed to investigate the determinants of health in the adult population of  
204 French Polynesia, using a combination of data obtained from a questionnaire, physical measurements,  
205 and biological analyses in 2100 inhabitants of 18 different islands distributed among the five  
206 archipelagoes.

## 207 208 **STUDY OBJECTIVES**

209 MATAEA is a Tahitian compound word (“MATA” means “eye” and “EA” means “health”) which can  
210 be translated by “take a look at health”. The first objective of the MATAEA project was to collect a  
211 wide range of data from a large number of inhabitants to assess the health status of the adult population  
212 of the five French Polynesian archipelagoes, and identify risk factors for NCDs and CDs related to the  
213 specific living context (including the lifestyle, place of residence, history of infections) and intrinsic  
214 characteristics of individuals (such as genetics, age, sex, oral and gut microbiome). Results will be  
215 made available to health authorities for them to adapt actions and preventive measures to better reduce  
216 diseases incidence. The second objective of the project was to use genomic data obtained from the  
217 residents to increase our understanding of the history of the settlement of the French Polynesian islands,  
218 and to identify the major demographic and adaptive events that may explain the current incidence of  
219 some NCDs, and the higher susceptibility to certain NCDs and CDs. Although designed as a general-  
220 purpose survey with a broad scope, topics identified as major public health issues will be given priority  
221 treatment by specialized laboratories involved in the project, as described below.

222 First, prevalence data for metabolic diseases (including obesity and diabetes) dating from 2010  
223 will be updated (14), and their associated risk factors (such as dietary habits, physical activity, blood

224 pressure, high blood sugar, excess body fat around the waist, abnormal cholesterol or triglyceride level,  
225 genetic susceptibility factors, microbiome composition) will be investigated.

226 Second, the seroprevalence of mosquito-borne diseases known to have previously circulated in  
227 French Polynesia (including the four serotypes of dengue, Zika and chikungunya) will be measured as  
228 previously published (51, 52), to assess the risk for new outbreaks to occur. In addition, the prevalence  
229 of filarial antigenemia will be evaluated to check whether the elimination threshold recommended by  
230 the WHO has been reached in all archipelagoes, subsequent to the strengthening of community  
231 treatment in islands most affected by Bancroftian lymphatic filariasis (35). Risk factors for those  
232 mosquito-borne diseases will also be sought. Among them, the level of exposure of the population to  
233 mosquito bites will be measured by analyzing the presence of antibodies targeting mosquito salivary  
234 proteins in the blood of participants, as previously described (53).

235 Third, screening for HBsAg and anti-HBV antibodies will be performed to assess the  
236 prevalence of current and past HBV infections among the inhabitants of the five archipelagoes,  
237 especially those with increased risk factors such as being borne before 1995 and living in the Austral  
238 archipelago. As there is no available data regarding the prevalence of hepatitis C virus (HCV)  
239 infections in French Polynesia, the presence of anti-HCV antibodies will also be tested.

240 Fourth, concentrations of several heavy metals (including mercury and lead) and pesticides will  
241 be measured in the blood of inhabitants of the five archipelagoes to assess the degree of environmental  
242 contamination and the risk for human health. Data collected in the questionnaire, such as the island of  
243 residence and dietary habits, will be used to identify risk factors associated with contamination with  
244 toxic metals and pesticides, as well as ciguatera poisoning. As there is no confirmatory test available  
245 to detect current or past ciguatera poisoning, estimate of the prevalence of this disease in the population  
246 of the five archipelagoes will be based on the information self-reported by the participants in the  
247 questionnaire.

248 Fifth, as SARS-CoV-2 was introduced into French Polynesia during the participants' inclusion  
249 period and a large number of cases with mild or no symptoms might have not been reported, the  
250 presence of specific antibodies will be analyzed in the blood samples of participants to evaluate the  
251 real proportion of the population infected in the different archipelagoes after the emergence of the  
252 virus.

253 Sixth, serological analyzes will be conducted for a panel of viruses known to regularly cause  
254 infections in French Polynesia (such as influenza viruses, human immunodeficiency virus, rotaviruses  
255 and enteroviruses), but for which there is little data on the immune status of the population.

256 Finally, the seroprevalence of rodent-borne pathogens including Hantaviruses will be  
257 determined, as the high incidence of leptospirosis suggests that other diseases transmitted by rodents  
258 may circulate in French Polynesia. The only serosurvey of hantavirus infections in French Polynesia  
259 was conducted in 1989 and found specific antibodies in a few samples from rats and humans (54).  
260 Consequently, data collected in the present study will allow to detect possible silent circulation of  
261 Hantaviruses.

## 262 263 **MATERIALS AND METHODS**

### 264 265 **Sampling Design**

266 The MATAEA project is a cross-sectional population-based survey conducted on a random sample of  
267 the general population aged from 18 to 69 years, representative of the five archipelagoes of French  
268 Polynesia. The sampling protocol is based on the previous population census dating from 2017 (1). A  
269 sample with a target size of 2100 participants, equally divided into three age groups (18-29, 30-44 and  
270 45-69), with a sex ratio of 1:1, was established. To represent all archipelagoes, French Polynesia was  
271 stratified into three geographical strata: Windward Islands (Society archipelago), Leeward Islands  
272 (Society archipelago), and other archipelagoes (Tuamotu, Gambier, Marquesas and Austral), which

273 respectively include 75%, 13% and 12% of the population (Table 1). Since the population size in the  
274 Windward Islands is much higher than in the Leeward Islands and in the other archipelagoes, the  
275 sample size was amplified in the latter two strata to keep sufficient precision around prevalence  
276 estimates for the health conditions under consideration. Consequently, the same sample size of 700  
277 subjects was chosen for the three strata, allowing a precision never exceeding +/- 3.7% around  
278 prevalence estimates within each strata. In each strata, for convenient reasons, the most populated  
279 islands with a health care center and an airport with regular flight rotations were selected for the study,  
280 and the number of participants to be recruited was proportional to the population size of the islands as  
281 detailed in Table 1. In each island, households were randomly selected by the *Institut de la Statistique*  
282 *de la Polynésie française* (ISPF, Tahiti), and in each household one resident meeting the criteria of age  
283 and sex sought for the study was recruited.

284

### 285 **Study timeline**

286 The recruitment of participants in the 18 islands selected for the study was initially planned from  
287 November 2019 to June 2020. However, following the introduction of SARS-CoV-2 in French  
288 Polynesia in March 2020, several interruptions occurred during the recruitment phases and the  
289 sampling period lengthened (Figure 2). The first break was caused by the population lockdown  
290 implemented from March 20 to May 21, 2020. Inclusions resumed in June 2020 but stopped the  
291 following month due to the occurrence of a first epidemic wave caused by the original Wuhan strain.  
292 Inclusions resumed once again in April 2021 but stopped during August and September 2021, because  
293 of a second epidemic wave caused by the Delta variant. The last recruitments were performed from  
294 October to December 2021.

295

### 296 **Inclusion/exclusion criteria**

297 The study enrolled men and women aged from 18 to 69 years at the time of enrollment, who had been  
298 residing in French Polynesia for at least six months, were affiliated to the French Polynesia social  
299 security or assimilated regimens, and were able to provide a written informed consent. Were excluded  
300 from the study the minors, pregnant or parturient women, persons deprived of their liberty by a judicial  
301 or administrative decision, adults being subject to a legal protection measure or unable to express their  
302 consent, people undergoing psychiatric care, people not affiliated to the French Polynesia social  
303 security or assimilated regimens, disabled people, and the homeless.

304

### 305 **Participant recruitment and informed consent**

306 Each household randomly selected for the study was visited by trained staff from the *Institut Louis*  
307 *Malardé* (ILM, Tahiti), and only one resident was recruited in the household. Detailed information on  
308 the purpose and procedures of the study were provided, to the individual selected, by the ILM staff.  
309 Then, signed written informed consent was obtained from the participant. Participation in the study  
310 involved agreeing to answer a questionnaire, to undergo physical measurements (height, weight, waist  
311 circumference, arterial pressure, and skin pigmentation), and to provide biological samples (blood,  
312 saliva, and optionally stool), as detailed in the next sections. The participant answered the questionnaire  
313 during face-to-face interview, and answers were reported on an electronic tablet device. Then, the  
314 participant was invited to provide a stool sample and was given a collection tube in case of acceptance.  
315 Finally, an appointment with a nurse was scheduled one to three days later, in the morning, to collect  
316 physical measurements and biological samples. The participant was asked to fast for at least 8 hours  
317 and to collect and store the stool sample in a fridge within 24 hours before the visit of the nurse.

318 Participants received no financial compensation. However, they freely benefited from the  
319 results of the anthropometric, blood pressure and fasting blood glucose measurements collected by the  
320 nurse, and of the hematology and biochemistry analyses performed from their blood samples at the

321 clinical laboratory of ILM. Moreover, and importantly, participants were informed if any atypical result  
322 was detected and were subsequently guided through a visit to a physician.

323

### 324 **Questionnaire**

325 Case report forms (CRF) were built with ODK Collect (Get ODK Inc., USA) which is an open-source  
326 mobile client. The CRF consisted of 216 items divided into three major sections: socio-demographic  
327 status, lifestyle behaviors, and general health and medical history. It contained questions from the  
328 standardized STEPS questionnaire of the WHO designed to monitor the main NCDs risk factors (55),  
329 and additional questions specific to the context of French Polynesia. Questions related to COVID-19  
330 were added in the questionnaire in April 2021. The detailed CRF is available in Supplemental Data 1.

331

### 332 **Physical measurements**

333

#### 334 *Anthropometric measurements*

335 Anthropometric measurements included height, weight and waist circumference. Standing height was  
336 measured in centimeters (cm) with a portable stadiometer (SECA, model 213, France). Weight was  
337 measured in kilograms (kg) using a portable electronic weighting scale (SECA, model 813, France).  
338 Waist circumference was measured in cm using a constant tension tape (SECA, model 203 measuring  
339 tape, France) at the midpoint between the lowest rib and above the iliac crest. Body mass index (BMI)  
340 was calculated as weight (in kg) divided by height (in m) squared. BMI values were categorized  
341 according to standardized criteria (56).

342

#### 343 *Blood pressure measurements*

344 Blood pressure was measured on the left arm at heart level using an automatic digital blood pressure  
345 monitor (Omron model HBP-1320, Omron Healthcare Co., Japan). The first measurement was  
346 performed after the participant rested for 15 min in a sitting position, then two additional measurements  
347 were performed 3 minutes apart. Results of the systolic and diastolic pressures were expressed in  
348 millimeter of mercury (mmHg).

349

#### 350 *Skin pigmentation measurements*

351 Skin pigmentation was measured on the inner arm between biceps and triceps using the DSM III Skin  
352 colorimeter (Cortex technology, Denmark). Four measurement replicates were performed for each  
353 participant. Colors were quantified using the L\*, a\*, and b\* parameters defined by the International  
354 commission on illumination (CIE, Vienna, Austria), where L\* measures the degree of brightness or  
355 whiteness, a\* the degree of redness, and b\* the yellowness. Skin erythema 'E' and melanin content  
356 'M' were also measured (57, 58).

357

### 358 **Biological sample collection and biobanking**

359

#### 360 *Blood*

361 A capillary whole blood sample was collected at the finger tip of each fasting participant using  
362 microtainer contact-activated lancets (Becton Dickinson, USA), and was immediately used for the  
363 measurement of blood glucose concentration (mg/dL) with the Freestyle Optium Neo H point-of-care  
364 device (Abbott Diabetes Care, France).

365 Blood samples were also collected by venipuncture in four 5 mL serum separation tubes, and  
366 in two 5 mL EDTA tubes (Becton Dickinson, USA). Serum separation tubes and EDTA tubes were  
367 maintained at 4 °C until centrifugation during 15 minutes at 3,500 and 2,000 rpm, respectively. Part of  
368 the serum and plasma samples were used by the clinical laboratory of ILM to measure several  
369 hematological and biochemical parameters as described in Table 2. The remaining samples of serum,



370 plasma and red blood cell pellets were aliquoted in several tubes and stored at -20 °C until processing  
371 as detailed in Table 3.

372

### 373 **Saliva**

374 A 2 mL sample of saliva was self-collected by each participant in an Oragene DNA tube pre-filled with  
375 2 mL of stabilization liquid following the manufacturer's protocol (DNA Genotek, Canada). After  
376 gentle mix, the sample tube was stored at 4 °C until processing (Table 3).

377

### 378 **Stool**

379 Stool samples were self-collected by participants in tubes pre-filled with 8 mL of DNA stabilization  
380 buffer following the manufacturer's instructions (Canvax Biotech, Spain), and stored in a fridge within  
381 24 hours before the appointment with the nurse. Then, stool samples were stored at 4 °C until shipment  
382 to ILM. Upon reception at ILM, stool samples were stored at -20 °C until processing (Table 3).

383

### 384 **Data management**

385 The data flow and processing of biological samples are detailed in Figure 3.

386 Each participant was assigned a unique identification number to anonymize the information  
387 collected in the CRF and biological samples. Personal identifying information such as last name, first  
388 name, and phone number only appeared on the consent form, which has been kept in a secure location  
389 accessible only to the biologists of the clinical laboratory of ILM.

390 Data collected in the CRF were transferred from electronic tablets to a password-protected  
391 ODK Aggregate server (Version 2.0.5, Get ODK Inc., USA). Then, these data were uploaded to a  
392 password-protected Redcap server (Version 9.5.11, Vanderbilt University, USA) used to aggregate all  
393 data from each participant. Results of hematological and biochemical analyses performed by the  
394 clinical laboratory of ILM were also uploaded to the Redcap server, and linked to questionnaire data  
395 using the unique identification number of each participant. The results of the analyses that will be  
396 performed later from the biological samples of the participants will also be uploaded to the Redcap  
397 server. All collaborators of the MATAEA project were given a personal and unique login and password  
398 to access data in the Redcap server.

399 The staff of ILM received training on ethical procedures and measures to protect confidentiality  
400 needed, and was required to sign a confidentiality agreement form. The Redcap database was validated  
401 according to the guidelines of the French National Commission of Data Protection and Individual  
402 Liberties, allowing collaboration with external researchers and collaborators.

403

### 404 **Data Analysis**

405 According to the data retrieved from the participants, indicators will be defined to identify subjects  
406 suffering from, or having a history, of any pathology targeted by the study.

407 For continuous data, summary statistics will include the arithmetic mean with 95% confidence  
408 interval (CI) or standard deviation (SD), or median with inter quartile range. For categorical data,  
409 frequency counts, percentages, and 95% CIs will be presented. The characteristics of the subjects will  
410 be compared according to sex, age category, and geographical area using the chi-square test for the  
411 categorical variables, and using the analysis of variance (ANOVA) for the continuous variables.

412 Non-standardized and standardized (weighted) results will be provided. Weights will be  
413 estimated by archipelago (except the Society archipelago for which the Windward Islands and Leeward  
414 Islands will be treated separately) and will correspond to the inverse of the probability for each subject  
415 to be selected, where the probability in a given archipelago is the number of subjects in each of the 6  
416 age/sex strata divided by the total number population in that strata.

417 Risk factors associated with each pathology (if the prevalence is high enough to justify a  
418 statistical analysis) will be identified using a logistic regression model. The factors investigated will

419 include age, sex, and all other relevant factors. These analyses will account for the sampling plan  
420 through consideration of survey weights.

421  
422 **Return of individual results to participants**

423 Results of physical measurements performed by a nurse were provided to each participant during the  
424 appointment. If any abnormal result was detected, the nurse advised the participant to consult a doctor  
425 immediately.

426 Results of hematological and biochemical analyses performed by the clinical laboratory of ILM from  
427 blood samples of each participant were available on a secured server. Participants could retrieve these  
428 results online using individual login valid for seven days, or anytime at ILM providing proof of identity.  
429 If any abnormal result was detected, the participant or the participant's attending doctor (depending on  
430 the participant's choice as indicated in the informed consent) was notified by a biologist of the clinical  
431 laboratory of ILM.

432 Participants will not be informed of individual research results that will be obtained by the specialized  
433 laboratories involved in the MATAEA project. However, if any research result suggests an underlying  
434 pathology, the participant or the participant's attending doctor (depending on the participant's choice  
435 as indicated in the informed consent) will be notified by a biologist of the clinical laboratory of ILM  
436 to carry out additional investigations.

437  
438 **STRENGTHS AND LIMITATIONS**

439 The MATAEA project is the first cross-sectional survey designed to investigate a broad range of health  
440 issues in the five archipelagoes of French Polynesia. The high number of participants and their wide  
441 geographical distribution guarantee a good representativeness of the population of French Polynesia.  
442 The large amount of data obtained for each participant from the CRF, physical measurements and  
443 biological analyses will make it possible to update the information on the prevalence of numerous  
444 NCDs and CDs known as major public health concerns in French Polynesia, and possibly identify  
445 specific indicators and/or risk factors for these diseases. The study will also provide new  
446 epidemiological information on poorly studied or unknown pathologies. Finally, the MATAEA project  
447 will generate a high amount of genetic data for a population that has been so far poorly represented in  
448 human genetic studies.

449 Nevertheless, the MATAEA project has some limitations that should be acknowledged. First,  
450 the population aged under 18 years was not included to the survey, which might have an impact on the  
451 estimate of the prevalence of certain pathologies. Second, participants were recruited in only 18 of the  
452 75 inhabited islands while differences may exist between the inhabitants of distinct islands within the  
453 same archipelago. Third, there might be an underrepresentation of hard-to-reach subjects, such as  
454 heavy drinkers or socially excluded persons, which might be more prone to some pathologies. Fourth,  
455 the number of participants recruited for the study may be not sufficient to investigate rare pathologies.  
456 Fifth, the cross-sectional nature of the survey does not allow to examine the temporal relationship  
457 between exposures and diseases under study. Finally, the sampling period has been interrupted three  
458 times because of the COVID-19 pandemic and more than two years elapsed between the first and last  
459 inclusion (Figure 2).

460  
461 **COMMUNITY ENGAGEMENT**

462 The main objectives of the MATAEA project have already been presented to the Health and Research  
463 authorities of French Polynesia as well as, in several occasions, to the general French Polynesian  
464 populations, in particular in the form of conferences principally conducted by Van-Mai Cao-Lormeau  
465 and Lluís Quintana-Murci. Furthermore, a video presenting the MATAEA project is already accessible  
466 online (<https://youtube.com/playlist?list=PLVLsoPZrkK4ipioiTOhGh0z05XZSHPC6H>). All the  
467 results generated in the framework of the MATAEA project will be also made available to the

468 population of French Polynesia through various communication channels. The results will be presented  
469 in an accessible way for the public, through conferences, seminars, and roundtables, and will be sent  
470 to the mayors of the islands that participated in the study to be relayed to the community. Finally, the  
471 public will be informed of the results published in scientific journals through popularized summaries  
472 translated into both French and Tahitian.

473

#### 474 **ETHICS STATEMENT**

475 This study involving human participants was approved by the *French Comité de protection des*  
476 *personnes* (CPP - OUEST III no. 19.08.60 / SI CNRIPH 19.07.02.38421) and the *Comité d’Ethique de*  
477 *la Polynésie française* (Avis no. 80 CEPF-03/09/2019). Written informed consent was obtained from  
478 all participants. People who were unable to express their consent or answer the questionnaire were  
479 excluded from the study. Data collection, storage, transfer and process were executed according to the  
480 European general data protection regulation procedures.

481

#### 482 **CONFLICT OF INTEREST**

483 The authors declare that the research was conducted in the absence of any commercial or financial  
484 relationships that could be construed as a potential conflict of interest.

485

#### 486 **AUTHOR CONTRIBUTIONS**

487 AF, LQM, AS, and VMCL designed and conceptualized the project; AF, LQM, EP, AS, JV, NP, JT,  
488 SO, SL, HB, PB, CG, ES, BC and PA participated in the design of the study protocol; IT, MA, and  
489 VMCL wrote the study protocol; SFP and NJ managed the ethical aspects of the project; NP and JT  
490 carried out the draw of participants; IT, MA, and VMCL supervised and coordinated the project; IT,  
491 EP, AJ, MR, VM, and KC performed the data management; CH and AB processed biological samples;  
492 GRL, DL and EP designed genetic analyses; VMCL acquired funding for the project; IT and MA  
493 drafted the manuscript. All authors read and approved the submitted version of the manuscript.

494

#### 495 **FUNDING**

496 The MATAEA project received financial support from *La Délégation à la Recherche de la Polynésie*  
497 *française* (Convention no. 03557/MED/REC du 29 mai 2019) and the *Contrat de Projet Etat-Pays*  
498 *2015-2020* (Arrêté no. HC/372/DIE/BPT du 18 mai 2018; Convention no. 03298/MTF/REC du 17 mai  
499 2018). The costs related to the shipping and analysis of the samples will be borne by the laboratories  
500 involved in the project.

501

#### 502 **ACKNOWLEDGEMENTS**

503 We thank the staff of all the laboratories that contributed to the realization of this study. We also  
504 acknowledge the municipal staff and the guides in the islands selected for the study for their support  
505 in recruiting participants. Finally, we especially thank all the individuals who willingly agreed to  
506 participate in this study

507

508

509 **Table 1. Geographical distribution of the 2,100 participants randomly selected for the**  
 510 **MATAEA project**  
 511

| Strata               |                      |             | Archipelago | Island    |                      |             |
|----------------------|----------------------|-------------|-------------|-----------|----------------------|-------------|
| Name                 | Population size (%)* | Sample size | Name        | Name      | Population size (%)* | Sample size |
| Windward Islands     | 207,333 (75%)        | 700         | Society     | Tahiti    | 189,517 (91%)        | 637         |
|                      |                      |             |             | Moorea    | 17,816 (9%)          | 63          |
| Leeward Islands      | 35,393 (13%)         | 700         | Society     | Raiatea   | 12,249 (36%)         | 252         |
|                      |                      |             |             | Bora Bora | 10,549 (31%)         | 217         |
|                      |                      |             |             | Tahaa     | 5,234 (15%)          | 105         |
|                      |                      |             |             | Huahine   | 6,075 (18%)          | 126         |
| Others archipelagoes | 33,192 (12%)         | 700         | Tuamotu     | Rangiroa  | 3,657 (16%)          | 112         |
|                      |                      |             |             | Fakarava  | 1,637 (7%)           | 49          |
|                      |                      |             |             | Hao       | 1,258 (5%)           | 35          |
|                      |                      |             |             | Makemo    | 1,508 (6%)           | 42          |
|                      |                      |             | Gambier     | Mangareva | 1,535 (7%)           | 49          |
|                      |                      |             | Marquesas   | Nuku Hiva | 2,951 (13%)          | 91          |
|                      |                      |             |             | Hiva Oa   | 2,243 (10%)          | 70          |
|                      |                      |             |             | Ua Pou    | 2,213 (9%)           | 63          |
|                      |                      |             | Austral     | Tubuai    | 2,217 (9%)           | 63          |
|                      |                      |             |             | Rurutu    | 2,466 (10%)          | 70          |
|                      |                      |             |             | Raivavae  | 903 (4%)             | 28          |
|                      |                      |             |             | Rimatara  | 872 (4%)             | 28          |
| <b>Total</b>         | 275,918              | 2,100       |             |           |                      | 2,100       |

512  
 513 \* data from the population census of 2017 (59)

514  
515

**Table 2. List of hematological and biochemical parameters analyzed for the MATAEA project**

| Group                       | Measured parameter                        | Units    | Test                 | Analyzer                            |
|-----------------------------|-------------------------------------------|----------|----------------------|-------------------------------------|
| <b>Complete blood count</b> | Hemoglobin                                | g/dL     | Spectrophotometry    | XT-4000 or XN-1000, Sysmex (France) |
|                             | Hematocrit                                | %        | Electrical impedance | XT-4000 or XN-1000, Sysmex (France) |
|                             | Leucocytes count                          | G/L      | Fluorocytometry      | XT-4000 or XN-1000, Sysmex (France) |
|                             | Neutrophils count                         | G/L or % | Fluorocytometry      | XT-4000 or XN-1000, Sysmex (France) |
|                             | Eosinophils count                         | G/L or % | Fluorocytometry      | XT-4000 or XN-1000, Sysmex (France) |
|                             | Lymphocytes count                         | G/L or % | Fluorocytometry      | XT-4000 or XN-1000, Sysmex (France) |
|                             | Monocytes count                           | G/L or % | Fluorocytometry      | XT-4000 or XN-1000, Sysmex (France) |
|                             | Platelets count                           | G/L      | Electrical impedance | XT-4000 or XN-1000, Sysmex (France) |
|                             | Mean platelet volume                      | fL       | Electrical impedance | XT-4000 or XN-1000, Sysmex (France) |
|                             | Red blood cells count                     | T/L      | Electrical impedance | XT-4000 or XN-1000, Sysmex (France) |
|                             | Red blood cell distribution width         | -        | Electrical impedance | XT-4000 or XN-1000, Sysmex (France) |
|                             | Mean corpuscular volume                   | fL       | Electrical impedance | XT-4000 or XN-1000, Sysmex (France) |
|                             | Mean corpuscular hemoglobin               | pg/cell  | Spectrophotometry    | XT-4000 or XN-1000, Sysmex (France) |
|                             | Mean corpuscular hemoglobin concentration | g/dL     | Spectrophotometry    | XT-4000 or XN-1000, Sysmex (France) |
| <b>Serum aspect</b>         | Serum aspect                              | -        | Visual assessment    | -                                   |
|                             | Serum index                               | UI       | Spectrophotometry    | Cobas c501, Roche (Switzerland)     |

|                               |                             |                            |                                                                          |                                             |
|-------------------------------|-----------------------------|----------------------------|--------------------------------------------------------------------------|---------------------------------------------|
| <b>Diabetes</b>               | Glycated hemoglobin A1c     | %                          | Capillary eletrophoresis                                                 | Capillarys 2 Flex Piercing, SEBIA (France)  |
|                               | Fasting blood glucose level | mg/dL                      | Fingertip lancing technique                                              | Optium Neo H, Abbott Diabetes Care (France) |
| <b>Lipids</b>                 | Total cholesterol           | mmol/l                     | Enzymatic colorimetric assay                                             | Cobas c501, Roche (Switzerland)             |
|                               | HDL-cholesterol             | mmol/l                     | Homogenous enzymatic colorimetric assay                                  | Cobas c501, Roche (Switzerland)             |
|                               | LDL-cholesterol             | mmol/l                     | Friedewald formula (60)                                                  | Cobas c501, Roche (Switzerland)             |
|                               | Triglycerides               | mmol/l                     | Enzymatic colorimetric assay                                             | Cobas c501, Roche (Switzerland)             |
| <b>Kidney function</b>        | Creatinine                  | μmol/L                     | Enzymatic colorimetric assay                                             | Cobas c501, Roche (Switzerland)             |
|                               | Glomerular filtration rate  | mL/min/1.73 m <sup>2</sup> | Chronic Kidney Disease Epidemiology Collaboration (CKD-EPI) formula (61) | Cobas c501, Roche (Switzerland)             |
| <b>Liver and inflammation</b> | Aspartate aminotransferase  | UI/L                       | Enzymatic colorimetric assay                                             | Cobas c501, Roche (Switzerland)             |
|                               | Alanine aminotransferase    | UI/L                       | Enzymatic colorimetric assay                                             | Cobas c501, Roche (Switzerland)             |
|                               | Gamma glutamyl transferase  | UI/L                       | Enzymatic colorimetric assay                                             | Cobas c501, Roche (Switzerland)             |
|                               | Total bilirubin             | μmol/L                     | Photometry assay                                                         | Cobas c501, Roche (Switzerland)             |
|                               | C-reactive protein          | mg/L                       | Particle-enhanced immunoturbidimetric assay                              | Cobas c501, Roche (Switzerland)             |

517 **Table 3. List of laboratory analyses planned in the MATAEA project**  
 518

| Sample type                    | Analysis                               | Laboratory                          |
|--------------------------------|----------------------------------------|-------------------------------------|
| Serum and plasma               | Hematological and biochemical analyses | LABM, ILM, Tahiti, French Polynesia |
| Serum                          | Arbovirus serology                     | LIV, ILM, Tahiti, French Polynesia  |
| Serum                          | Mosquito saliva serology               | LEM, ILM, Tahiti, French Polynesia  |
| Serum                          | Hantavirus serology                    | EIRU, IP, Paris, France             |
| Serum                          | VirScan (62)                           | HEGU, IP, Paris, France             |
| Plasma                         | Hepatitis B and C serologies           | CHPF, Tahiti, French Polynesia      |
| Plasma                         | Pesticides quantitation                | INSPQ, Montreal, Canada             |
| Red blood cells pellet         | Heavy metals quantitation              | INSPQ, Montreal, Canada             |
| Red blood cells pellet, saliva | Genetic analysis                       | HEGU, IP, Paris, France             |
| Saliva                         | Oral microbiome analysis               | HEGU, IP, Paris, France             |
| Stool                          | Intestinal microbiome analysis         | HEGU, IP, Paris, France             |

519 LABM: Clinical Laboratory; ILM: Institut Louis Malardé; LIV: Laboratory of research on emerging  
 520 viral diseases; LEM: Laboratory of research in medical entomology; IP: Institut Pasteur; EIRU:  
 521 Environment and Infectious Risk Unit ; HEGU : Human Evolutionary Genetics Unit ; CHPF: Centre  
 522 Hospitalier de la Polynésie française; INSPQ: Institut National de Santé Publique du Québec.

523

## 524 **References**

- 525 1. Institut de la Statistique de la Polynésie française. Points fort de la Polynésie française, Le  
526 recensement de la population en Polynésie française en 2017. (2018). Available online at:  
527 [https://data.ispf.pf/docs/default-source/publi-pf-bilans-et-etudes/pf-etudes-7-2018-rp-](https://data.ispf.pf/docs/default-source/publi-pf-bilans-et-etudes/pf-etudes-7-2018-rp-2017.pdf?sfvrsn=8)  
528 [2017.pdf?sfvrsn=8](https://data.ispf.pf/docs/default-source/publi-pf-bilans-et-etudes/pf-etudes-7-2018-rp-2017.pdf?sfvrsn=8) (Accessed March 20, 2023).
- 529 2. Gosling AL, Matisoo-Smith EA. The evolutionary history and human settlement of Australia  
530 and the Pacific. *Curr Opin Genet Dev.* 2018;53:53-9. doi: 10.1016/j.gde.2018.06.015.
- 531 3. Ioannidis AG, Blanco-Portillo J, Sandoval K, Hagelberg E, Barberena-Jonas C, Hill AVS, et  
532 al. Paths and timings of the peopling of Polynesia inferred from genomic networks. *Nature.*  
533 2021;597(7877):522-6. doi: 10.1038/s41586-021-03902-8.
- 534 4. Choin J, Mendoza-Revilla J, Arauna LR, Cuadros-Espinoza S, Cassar O, Larena M, et al.  
535 Genomic insights into population history and biological adaptation in Oceania. *Nature.*  
536 2021;592(7855):583-9. doi: 10.1038/s41586-021-03236-5.
- 537 5. Hudjashov G, Endicott P, Post H, Nagle N, Ho SYW, Lawson DJ, et al. Investigating the  
538 origins of eastern Polynesians using genome-wide data from the Leeward Society Isles. *Sci Rep.*  
539 2018;8(1):1823. doi: 10.1038/s41598-018-20026-8.
- 540 6. Kirch PV. Modern Polynesian genomes offer clues to early eastward migrations. *Nature.*  
541 2021;597(7877):477-8. doi: 10.1038/d41586-021-01719-z.
- 542 7. Horwood PF, Tarantola A, Goarant C, Matsui M, Klement E, Umezaki M, et al. Health  
543 Challenges of the Pacific Region: Insights From History, Geography, Social Determinants, Genetics,  
544 and the Microbiome. *Front Immunol.* 2019;10:2184. doi: 10.3389/fimmu.2019.02184.
- 545 8. Barreiro LB, Quintana-Murci L. Evolutionary and population (epi)genetics of immunity to  
546 infection. *Hum Genet.* 2020;139(6-7):723-32. doi: 10.1007/s00439-020-02167-x.
- 547 9. Quach H, Rotival M, Pothlichet J, Loh YE, Dannemann M, Zidane N, et al. Genetic  
548 Adaptation and Neandertal Admixture Shaped the Immune System of Human Populations. *Cell.*  
549 2016;167(3):643-56.e17. doi: 10.1016/j.cell.2016.09.024.
- 550 10. Quintana-Murci L. Human Immunology through the Lens of Evolutionary Genetics. *Cell.*  
551 2019;177(1):184-99. doi: 10.1016/j.cell.2019.02.033.
- 552 11. Gouvernement de la Polynésie française. La politique de santé de la Polynésie française -  
553 Orientations stratégiques 2016-2025. (2016). Available online at: [https://www.service-](https://www.service-public.pf/dsp/wp-content/uploads/sites/12/2017/06/La-politique-de-Sante%CC%81-en-PF-2016-2025-web.pdf)  
554 [public.pf/dsp/wp-content/uploads/sites/12/2017/06/La-politique-de-Sante%CC%81-en-PF-2016-](https://www.service-public.pf/dsp/wp-content/uploads/sites/12/2017/06/La-politique-de-Sante%CC%81-en-PF-2016-2025-web.pdf)  
555 [2025-web.pdf](https://www.service-public.pf/dsp/wp-content/uploads/sites/12/2017/06/La-politique-de-Sante%CC%81-en-PF-2016-2025-web.pdf) (Accessed March 20, 2023).
- 556 12. Institut de la Statistique de la Polynésie française. Bilan démographique 2020. (2021).  
557 Available online at:  
558 [https://www.ispf.pf/content/uploads/1256\\_Bilan\\_demographique\\_2020\\_f9055f2afa.pdf](https://www.ispf.pf/content/uploads/1256_Bilan_demographique_2020_f9055f2afa.pdf) (Accessed  
559 March 20, 2023).
- 560 13. Reeve E, Lamichhane P, McKenzie B, Waqa G, Webster J, Snowdon W, et al. The tide of  
561 dietary risks for noncommunicable diseases in Pacific Islands: an analysis of population NCD  
562 surveys. *BMC Public Health.* 2022;22(1):1521. doi: 10.1186/s12889-022-13808-3.
- 563 14. Bertrand S, Berry A-L. Enquête santé 2010 en Polynésie française : surveillance des facteurs  
564 de risque des maladies non transmissibles. *Bull Épidémiol Hebd.* 2013;28-29:326-32.



- 565 15. Direction de la Santé. Statistiques des causes de décès en Polynésie française 2011-2015.  
566 (2019). Available online at: [https://www.service-public.pf/dsp/wp-](https://www.service-public.pf/dsp/wp-content/uploads/sites/12/2020/02/Rapport_-_StatistiquesCausesDC2011_15PF.pdf)  
567 [content/uploads/sites/12/2020/02/Rapport -StatistiquesCausesDC2011\\_15PF.pdf](https://www.service-public.pf/dsp/wp-content/uploads/sites/12/2020/02/Rapport_-_StatistiquesCausesDC2011_15PF.pdf) (Accessed March  
568 20, 2023).
- 569 16. Institut d'Emission d'Outre-Mer. Rapport annuel 2017 de l'IEOM - Polynésie française.  
570 (2018). Available online at:  
571 [https://www.ieom.fr/IMG/pdf/rapport\\_annuel\\_2017\\_ieom\\_polynesie\\_francaise\\_-\\_juin\\_2018.pdf](https://www.ieom.fr/IMG/pdf/rapport_annuel_2017_ieom_polynesie_francaise_-_juin_2018.pdf)  
572 (Accessed March 20, 2023).
- 573 17. Direction de la Santé. Cancers en Polynésie française - Statistiques du Registre des cancers.  
574 (2016). Available online at: [https://www.service-public.pf/dsp/wp-](https://www.service-public.pf/dsp/wp-content/uploads/sites/12/2021/12/Rapport-cancer-PF-2016-.pdf)  
575 [content/uploads/sites/12/2021/12/Rapport-cancer-PF-2016-.pdf](https://www.service-public.pf/dsp/wp-content/uploads/sites/12/2021/12/Rapport-cancer-PF-2016-.pdf) (Accessed March 20, 2023).
- 576 18. Tervonen H, Foliaki S, Bray F, Roder D. Cancer epidemiology in the small nations of Pacific  
577 Islands. *Cancer epidemiology*. 2017;50(Pt B):184-92. doi: 10.1016/j.canep.2017.09.002.
- 578 19. World Health Organisation. Global Cancer Observatory - French Polynesia in 2020. (2021).  
579 Available online at: [https://gco.iarc.fr/today/data/factsheets/populations/258-french-polynesia-fact-](https://gco.iarc.fr/today/data/factsheets/populations/258-french-polynesia-factsheets.pdf)  
580 [sheets.pdf](https://gco.iarc.fr/today/data/factsheets/populations/258-french-polynesia-factsheets.pdf) (Accessed March 20, 2023).
- 581 20. Condat B, Lascols A, Lutringer-Magnin D, Chakhtoura F, Lastere S, Bronstein J.  
582 Épidémiologie du carcinome hépatocellulaire en Polynésie française. *Bull Épidémiol Hebd*.  
583 2022;16:280-7.
- 584 21. Chinain M, Gatti CM, Roué M, Darius HT. Ciguatera poisoning in French Polynesia: insights  
585 into the novel trends of an ancient disease. *New microbes and new infections*. 2019;31:100565. doi:  
586 10.1016/j.nmni.2019.100565.
- 587 22. Chinain M, Gatti CM. Surveillance de la ciguatera en Polynésie française - Bilan 2021.  
588 (2022). Available online at: [https://ciguatera.pf/images/BILAN\\_CIGUATERA\\_PF\\_2021\\_.pdf](https://ciguatera.pf/images/BILAN_CIGUATERA_PF_2021_.pdf)  
589 (Accessed March 20, 2023).
- 590 23. St-Jean A, Suhas E, De Pina JJ, Cordier S, Lucas M, Ayotte P. Exposure to toxic metals and  
591 polychlorinated biphenyls of adolescents and adults from two atolls in the Tuamotu Archipelago  
592 (French Polynesia). *The Science of the total environment*. 2019;695:133791. doi:  
593 10.1016/j.scitotenv.2019.133791.
- 594 24. Dewailly E, Chateau-Degat L, Suhas E. Fish consumption and health in French Polynesia.  
595 *Asia Pacific journal of clinical nutrition*. 2008;17(1):86-93.
- 596 25. Dewailly E, Suhas E, Mou Y, Dallaire R, Chateau-Degat L, Chansin R. High fish  
597 consumption in French Polynesia and prenatal exposure to metals and nutrients. *Asia Pacific journal*  
598 *of clinical nutrition*. 2008;17(3):461-70.
- 599 26. Roche H, Salvat B, Ramade F. Assessment of the pesticides pollution of coral reefs  
600 communities from French Polynesia. *Revue d'Ecologie (Terre Vie)*. 2011;66(1):3-10. doi:  
601 10.3406/revec.2011.1553.
- 602 27. Salvat B, Roche H, Berny P, Ramade F. Recherches sur la contamination par les pesticides  
603 d'organismes marins des réseaux trophiques récifaux de Polynésie Française. *Revue d'Ecologie*  
604 *(Terre Vie)*. 2012;67(2):129-47. doi: 10.3406/revec.2012.1629.
- 605 28. Salvat B, Roche H, Ramade F. On the occurrence of a widespread contamination by  
606 herbicides of coral reef biota in French Polynesia. *Environ Sci Pollut Res Int*. 2016;23(1):49-60. doi:  
607 10.1007/s11356-015-4395-9.

- 608 29. Hubert B. Situation des maladies infectieuses en Polynésie française en 2001. 2001. doi:  
609 10.13140/RG.2.1.3451.2804.
- 610 30. Direction de la Santé. La tuberculose en Polynésie française - Rapport annuel 2018. (2018).  
611 Available online at: [https://www.service-public.pf/dsp/wp-content/uploads/sites/12/2019/04/Rapport-](https://www.service-public.pf/dsp/wp-content/uploads/sites/12/2019/04/Rapport-tuberculose-2018.pdf)  
612 [tuberculose-2018.pdf](https://www.service-public.pf/dsp/wp-content/uploads/sites/12/2019/04/Rapport-tuberculose-2018.pdf) (Accessed March 20, 2023).
- 613 31. Musso D, Rovey C, Loukil A, Vialette V, Nguyen NL. Leprosy in French Polynesia. *New*  
614 *microbes and new infections*. 2019;29:100514. doi: 10.1016/j.nmni.2018.10.010.
- 615 32. Ichimori K, Graves PM. Overview of PacELF-the Pacific Programme for the Elimination of  
616 Lymphatic Filariasis. *Tropical medicine and health*. 2017;45:34. doi: 10.1186/s41182-017-0075-4.
- 617 33. Kline K, McCarthy JS, Pearson M, Loukas A, Hotez PJ. Neglected tropical diseases of  
618 Oceania: review of their prevalence, distribution, and opportunities for control. *PLoS neglected*  
619 *tropical diseases*. 2013;7(1):e1755. doi: 10.1371/journal.pntd.0001755.
- 620 34. Mou Y, Plichart C, Legrand A, Mallet H, Cerf N, Nguyen L. Evaluation de la prevalence de  
621 la filariose lymphatique en 2008 en Polynésie française. *Bull Epidémiol Hebd*. 2009;48-49-50:504-7.
- 622 35. Segalin JM, Le Calvez E. Programme de lutte contre les maladies tropicales négligées en  
623 Polynésie française 2019-2023. (2019). Available online at: [https://www.service-public.pf/dsp/wp-](https://www.service-public.pf/dsp/wp-content/uploads/sites/12/2019/11/2019-03-14-PROGRAMME-MTN.pdf)  
624 [content/uploads/sites/12/2019/11/2019-03-14-PROGRAMME-MTN.pdf](https://www.service-public.pf/dsp/wp-content/uploads/sites/12/2019/11/2019-03-14-PROGRAMME-MTN.pdf) (Accessed March 20, 2023).
- 625 36. Boutin JP, Sainte Marie FF, Cartel JL, Cardines R, Girard M, Roux J. Prevalence of hepatitis  
626 B virus infection in the Austral archipelago, French Polynesia: identification of transmission patterns  
627 for the formulation of immunization strategies. *Trans R Soc Trop Med Hyg*. 1990;84(2):283-7. doi:  
628 10.1016/0035-9203(90)90288-p.
- 629 37. Moulia-Pelat J, Spiegel A, Excler J, Martin P, Roux J, Boutin J, et al. Lutte contre l'hépatite  
630 B en Polynésie française par un programme de vaccination systématique des nouveau-nés avec le  
631 vaccin Genhevac B®. *Cahiers d'études et de recherches francophones / Santé*. 1996;6(1):11-5.
- 632 38. Gouvernement de la Polynésie Française. Délibération n° 95-63 AT du 23 mai 1995 portant  
633 réglementation des vaccinations contre certaines maladies transmissibles chez l'enfant. (1995).  
634 Available online at:  
635 [https://lexpol.cloud.pf/document.php?document=190635&deb=1202&fin=1203&titre=RMOpbGliw6](https://lexpol.cloud.pf/document.php?document=190635&deb=1202&fin=1203&titre=RMOpbGliw6lyYXRpb24gbsKwIDk1LTZyZIEFUIGR1IDIzLzA1LzE5OTU=)  
636 [lyYXRpb24gbsKwIDk1LTZyZIEFUIGR1IDIzLzA1LzE5OTU=](https://lexpol.cloud.pf/document.php?document=190635&deb=1202&fin=1203&titre=RMOpbGliw6lyYXRpb24gbsKwIDk1LTZyZIEFUIGR1IDIzLzA1LzE5OTU=) (Accessed March 20, 2023).
- 637 39. Patel MK, Le Calvez E, Wannemuehler K, Ségalin JM. Hepatitis B Vaccination Coverage  
638 and Prevalence of Hepatitis B Surface Antigen Among Children in French Polynesia, 2014. *The*  
639 *American journal of tropical medicine and hygiene*. 2016;94(6):1370-5. doi: 10.4269/ajtmh.15-0903.
- 640 40. Aubry M, Cao-Lormeau VM. History of arthropod-borne virus infections in French  
641 Polynesia. *New microbes and new infections*. 2019;29:100513. doi: 10.1016/j.nmni.2019.01.009.
- 642 41. Aubry M, Mapotoeke M, Teissier A, Paoaafaite T, Dumas-Chastang E, Giard M, et al.  
643 Dengue virus serotype 2 (DENV-2) outbreak, French Polynesia, 2019. *Euro surveillance : bulletin*  
644 *Europeen sur les maladies transmissibles = European communicable disease bulletin*. 2019;24(29).  
645 doi: 10.2807/1560-7917.Es.2019.24.29.1900407.
- 646 42. Cao-Lormeau VM, Roche C, Teissier A, Robin E, Berry AL, Mallet HP, et al. Zika virus,  
647 French polynesia, South pacific, 2013. *Emerging infectious diseases*. 2014;20(6):1085-6. doi:  
648 10.3201/eid2006.140138.

- 649 43. Aubry M, Teissier A, Roche C, Richard V, Yan AS, Zisou K, et al. Chikungunya outbreak,  
650 French Polynesia, 2014. *Emerging infectious diseases*. 2015;21(4):724-6. doi:  
651 10.3201/eid2104.141741.
- 652 44. Cao-Lormeau VM, Blake A, Mons S, Lastère S, Roche C, Vanhomwegen J, et al. Guillain-  
653 Barré Syndrome outbreak associated with Zika virus infection in French Polynesia: a case-control  
654 study. *Lancet (London, England)*. 2016;387(10027):1531-9. doi: 10.1016/s0140-6736(16)00562-8.
- 655 45. Besnard M, Eyrolle-Guignot D, Guillemette-Artur P, Lastère S, Bost-Bezeaud F, Marcelis L,  
656 et al. Congenital cerebral malformations and dysfunction in fetuses and newborns following the 2013  
657 to 2014 Zika virus epidemic in French Polynesia. *Euro surveillance : bulletin Européen sur les*  
658 *maladies transmissibles = European communicable disease bulletin*. 2016;21(13). doi: 10.2807/1560-  
659 7917.Es.2016.21.13.30181.
- 660 46. Barboza P, Baudon C, Chérié-Challine L, Gastellu-Etchegorry M, Gueguen J, La Ruche G, et  
661 al. Influenza A(H1N1)2009 in the French Pacific territories: assessment of the epidemic wave during  
662 the austral winter. *Clinical microbiology and infection : the official publication of the European*  
663 *Society of Clinical Microbiology and Infectious Diseases*. 2010;16(4):304-8. doi: 10.1111/j.1469-  
664 0691.2010.03172.x.
- 665 47. Aubry M, Maset N, Chapman L, Simon A, Olivier S, Bos R, et al. Seroprevalence of SARS-  
666 CoV-2 Antibodies in French Polynesia and Perspective for Vaccine Strategies. *Preprints*. 2022. doi:  
667 10.20944/preprints202212.0386.v1.
- 668 48. Direction de la Santé. La leptospirose en Polynésie française – Rapport annuel 2018. (2018).  
669 Available online at: [https://www.service-public.pf/dsp/wp-](https://www.service-public.pf/dsp/wp-content/uploads/sites/12/2022/04/190314_Rapport-leptospirose-2018.pdf)  
670 [content/uploads/sites/12/2022/04/190314\\_Rapport-leptospirose-2018.pdf](https://www.service-public.pf/dsp/wp-content/uploads/sites/12/2022/04/190314_Rapport-leptospirose-2018.pdf) (Accessed March 20,  
671 2023).
- 672 49. Lévy M, Baudet J, Beau F, Devaud F, Sauget A. Étude de prévalence de la sensibilité aux  
673 antibiotiques de *Staphylococcus aureus* en Polynésie française, 2006-2008. *Bull Epidemiol Hebd*  
674 *Thématique*. 2009;48-49-50:526-28.
- 675 50. Leitwein K. Evaluation de la mise en place d'une méthode de dépistage échographique  
676 simplifiée des cardiopathies rhumatismales chroniques chez les élèves de CM2 des années 2012/2013  
677 et 2013/2014 à Moorea en Polynésie Française 2017. Available online at:  
678 <https://dumas.ccsd.cnrs.fr/dumas-01534602/document> (Accessed March 20, 2023).
- 679 51. Aubry M, Teissier A, Huart M, Merceron S, Vanhomwegen J, Mapotoeke M, et al.  
680 Seroprevalence of Dengue and Chikungunya Virus Antibodies, French Polynesia, 2014-2015.  
681 *Emerging infectious diseases*. 2018;24(3):558-61. doi: 10.3201/eid2403.171149.
- 682 52. Aubry M, Teissier A, Huart M, Merceron S, Vanhomwegen J, Roche C, et al. Zika Virus  
683 Seroprevalence, French Polynesia, 2014-2015. *Emerging infectious diseases*. 2017;23(4):669-72. doi:  
684 10.3201/eid2304.161549.
- 685 53. Mathieu-Daudé F, Claverie A, Plichart C, Boulanger D, Mphande FA, Bossin HC. Specific  
686 human antibody responses to *Aedes aegypti* and *Aedes polynesiensis* saliva: A new epidemiological  
687 tool to assess human exposure to disease vectors in the Pacific. *PLoS neglected tropical diseases*.  
688 2018;12(7):e0006660. doi: 10.1371/journal.pntd.0006660.
- 689 54. Chungue E, Rollin PE, Saluzzo JF, Gentile B, Roux JF, Sureau P. Serological survey of  
690 Hantavirus infection in French Polynesia. *Trans R Soc Trop Med Hyg*. 1989;83(2):258. doi:  
691 10.1016/0035-9203(89)90669-x.

- 692 55. World Health Organisation. Standard STEPS instrument. (2020). Available online at:  
693 <https://www.who.int/teams/noncommunicable-diseases/surveillance/systems-tools/steps/instrument>  
694 (Accessed March 20, 2023).
- 695 56. World Health Organisation. Obesity: preventing and managing the global epidemic. Report of  
696 a WHO consultation. World Health Organization technical report series. 2000;894:i-xii, 1-253.
- 697 57. Matias AR, Ferreira M, Costa P, Neto P. Skin colour, skin redness and melanin biometric  
698 measurements: comparison study between Antera(®) 3D, Mexameter(®) and Colorimeter(®). Skin  
699 research and technology : official journal of International Society for Bioengineering and the Skin  
700 (ISBS) [and] International Society for Digital Imaging of Skin (ISDIS) [and] International Society  
701 for Skin Imaging (ISSI). 2015;21(3):346-62. doi: 10.1111/srt.12199.
- 702 58. Wong LC, Jamil A, Md Nor N. The effect of pre-phototest sun exposure on minimal  
703 erythema dose and minimal melanogenic dose among skin phototypes III, IV and V.  
704 Photodermatology, photoimmunology & photomedicine. 2018;34(6):400-4. doi:  
705 10.1111/phpp.12410.
- 706 59. Institut de la Statistique de la Polynésie française. Recensement de la population 2017-  
707 Données détaillées - Population par Géographie administrative et par Age décennal. (2018).  
708 Available online at: [https://data.ispf.pf/bases/Recensements/2017/Donnees\\_detaillees.aspx](https://data.ispf.pf/bases/Recensements/2017/Donnees_detaillees.aspx) (Accessed  
709 March 20, 2023).
- 710 60. Friedewald WT, Levy RI, Fredrickson DS. Estimation of the concentration of low-density  
711 lipoprotein cholesterol in plasma, without use of the preparative ultracentrifuge. Clin Chem.  
712 1972;18(6):499-502. doi: 10.1186/s12944-019-1178-1.
- 713 61. Levey AS, Stevens LA, Schmid CH, Zhang YL, Castro AF, 3rd, Feldman HI, et al. A new  
714 equation to estimate glomerular filtration rate. Ann Intern Med. 2009;150(9):604-12. doi:  
715 10.7326/0003-4819-150-9-200905050-00006.
- 716 62. Xu GJ, Kula T, Xu Q, Li MZ, Vernon SD, Ndung'u T, et al. Viral immunology.  
717 Comprehensive serological profiling of human populations using a synthetic human virome. Science  
718 (New York, NY). 2015;348(6239):aaa0698. doi: 10.1126/science.aaa0698.
- 719
- 720

721 **Figure 1.** Map of French Polynesia showing the geographical distribution of the five archipelagoes  
722 (Society, Tuamotu, Gambier, Marquesas and Austral) compared to the European continent (showed at  
723 the same scale). Flight connections between Tahiti and the islands selected for the survey are indicated  
724 by orange lines. Inset map at upper left shows location of French Polynesia (red circle) within the  
725 Polynesian triangle (black triangle) bounded by the islands of Hawaii, New Zealand and Easter Island  
726 in the Pacific Ocean.  
727

728 **Figure 2.** Study timeline for the MATAEA project. Recruitment of participants in the 18 islands of  
729 French Polynesia started on November 4, 2019, and ended on December 8, 2021. Three breaks  
730 occurred during that period because of SARS-CoV-2 circulation: (1) population lockdown from  
731 March 20 to May 21, 2020; (2) first epidemic wave due to the SARS-CoV-2 Wuhan strain from  
732 August 2020 to February 2021; (3) second epidemic wave due the SARS-CoV-2 Delta variant from  
733 August to September 2021.

734 **Figure 3.** Data flow and biological samples processing for the MATAEA project. LABM: Clinical  
735 Laboratory; ILM: Institut Louis Malardé; LIV: Laboratory of research on emerging viral diseases; IP:  
736 Institut Pasteur.  
737

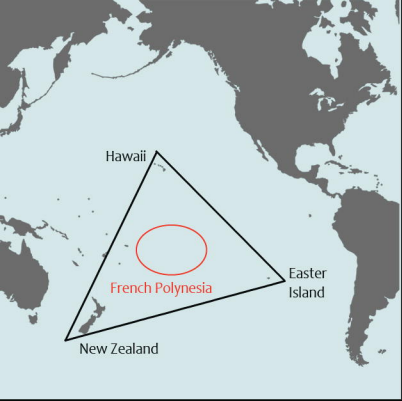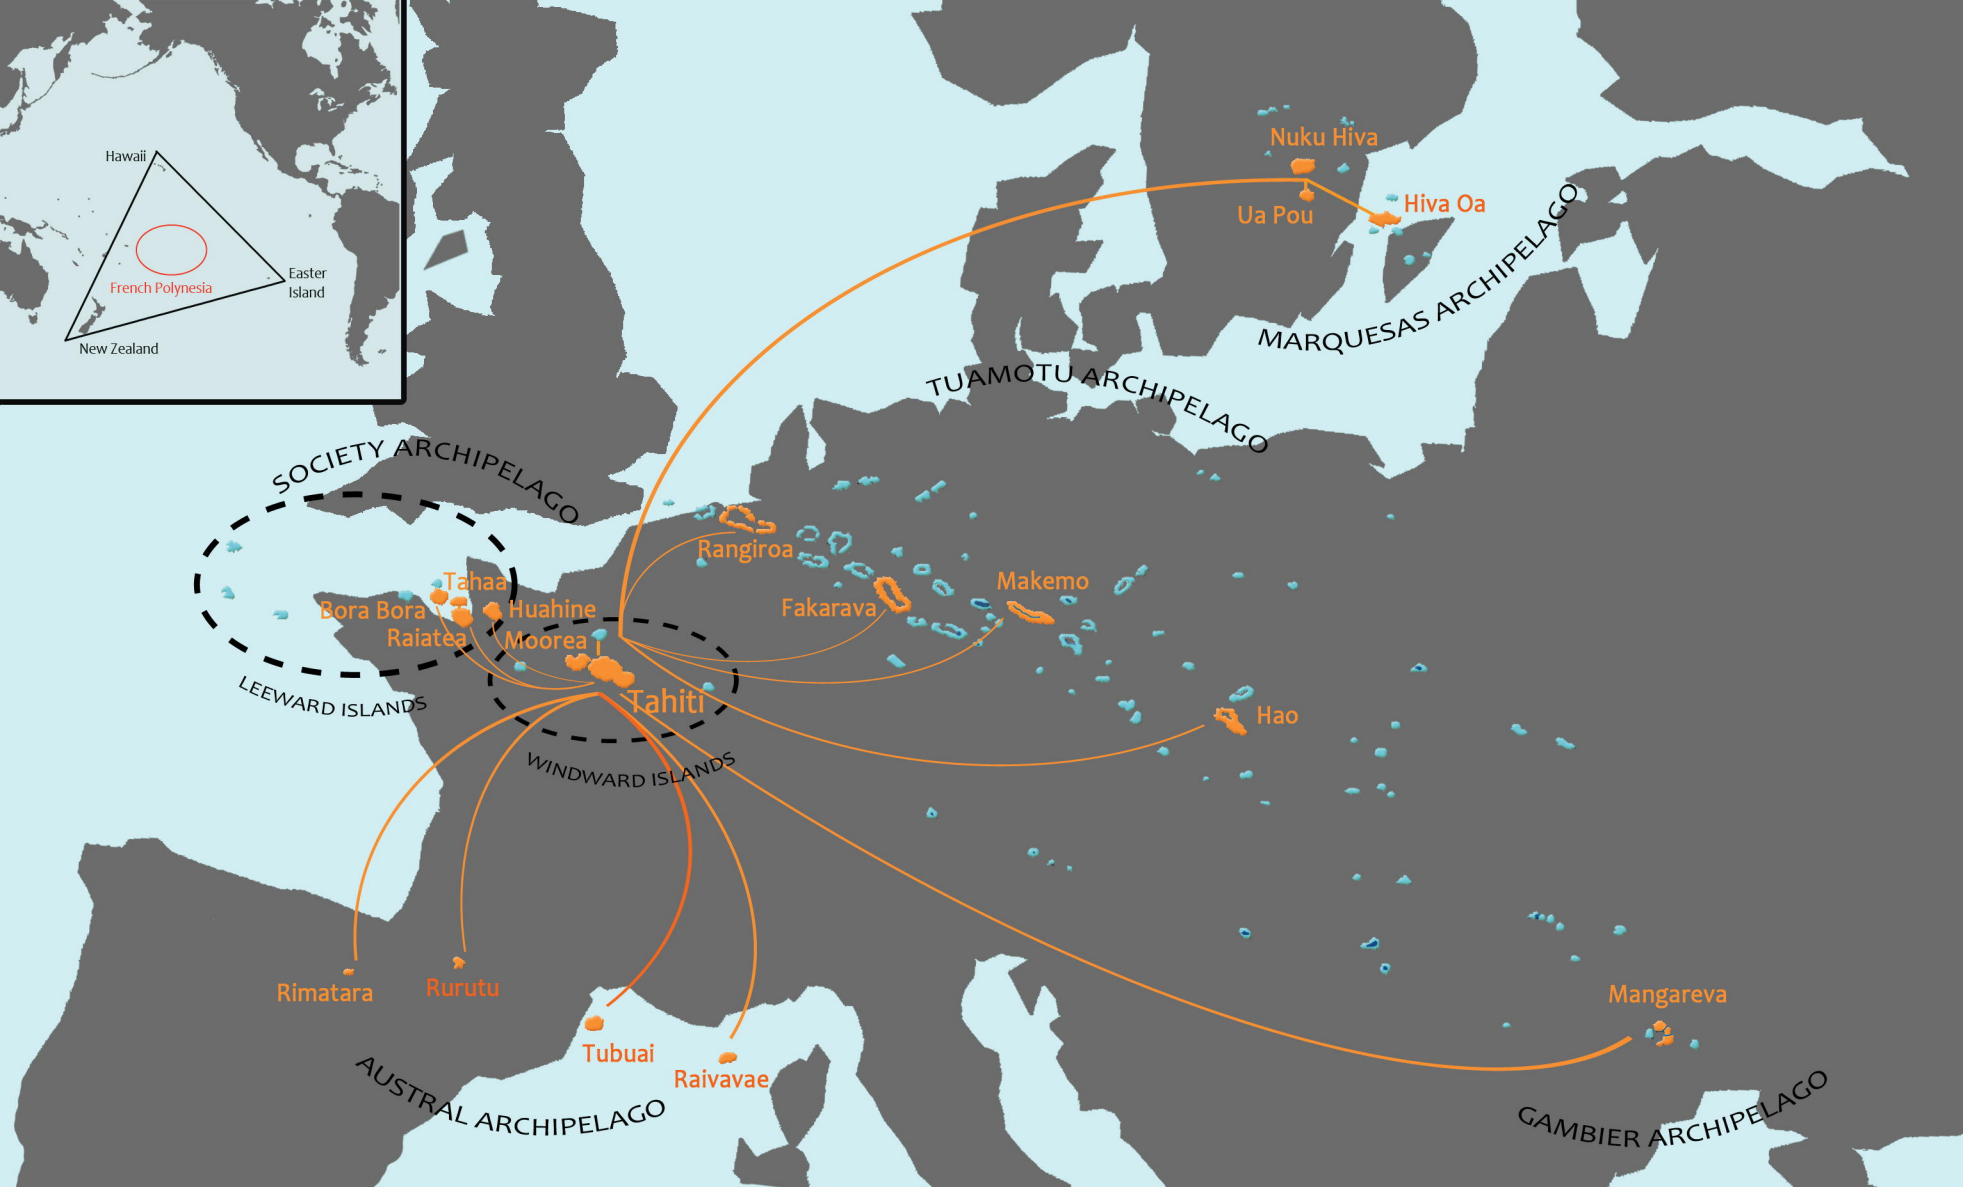

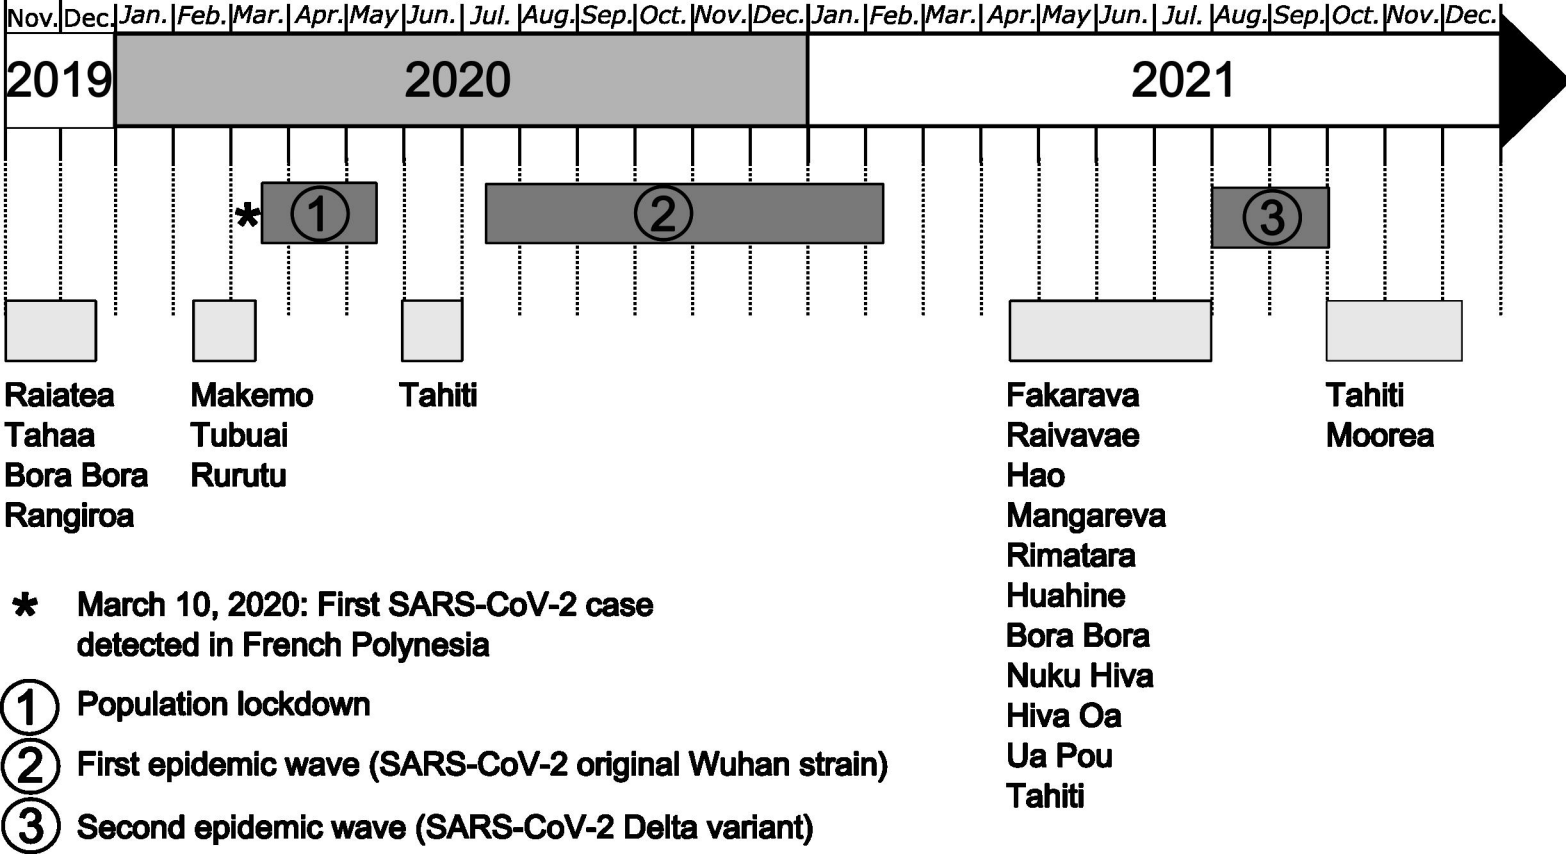

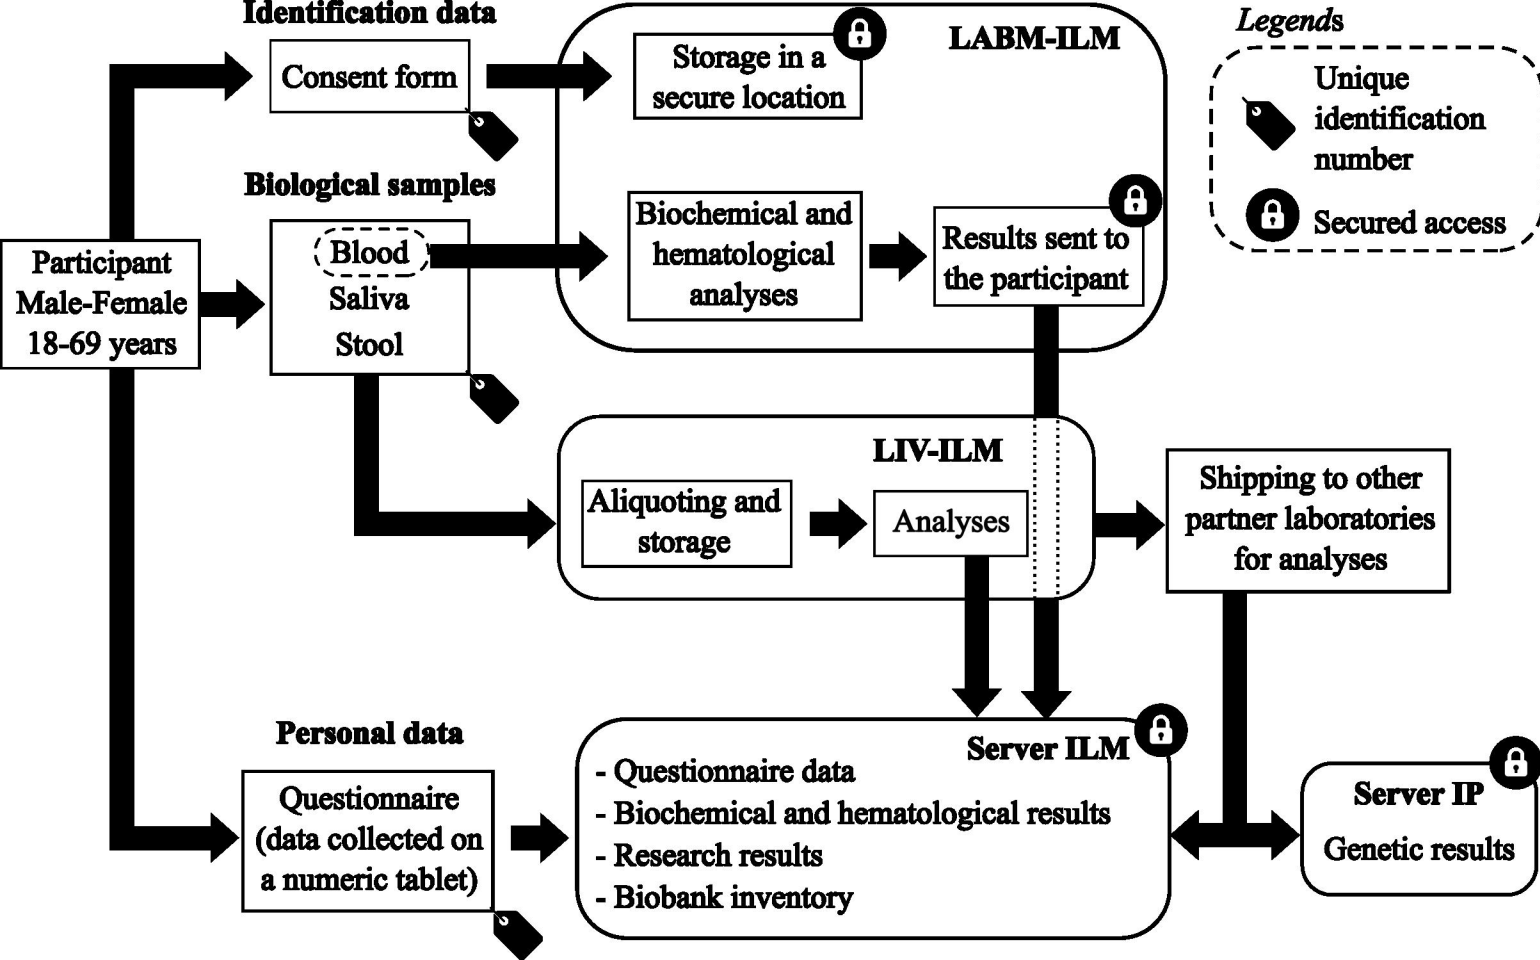

Source: https://medrxiv.org/content/10.1101/2023.04.05.23288204v1.full.pdf
